# Supplementary material
Source: publisher figshare collection journal article supplement (https://acs.figshare.com/ndownloader/files/18535850)
Supplement: Supplementary file 1 [file 18535850]

## Supporting Information

# Surface Reinforcing Balloon Trick-Inspired Separator/Li metal Integrated Assembly to Improve Electrochemical Performance of Li Metal Batteries

*Junyoung Choi<sup>†</sup>, Dahee Jin<sup>†,‡</sup>, Yong Min Lee<sup>‡,\*\*</sup>, and Myung-Hyun Ryou<sup>†\*</sup>*

<sup>†</sup> Department of Chemical and Biological Engineering, Hanbat National University, 125 Dongseo-daero, Yuseong-gu, Daejeon, 34158, Republic of Korea

<sup>‡</sup> Department of Energy Systems Engineering, Daegu Gyeongbuk Institute of Science and Technology (DGIST), 333 Techno Jungang-Daero, Daegu 42988, Republic of Korea

\*E-mail: [mhryou@hanbat.ac.kr](mailto:mhryou@hanbat.ac.kr). (M.-H.R.).

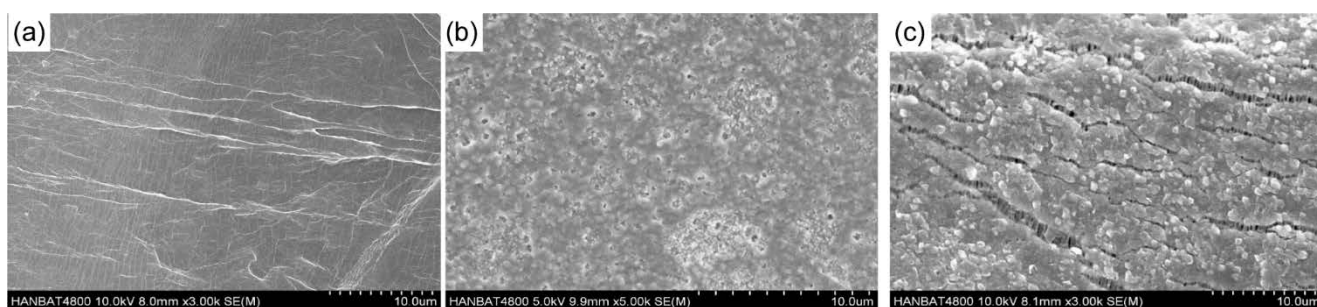

**Figure S1.** Scanning electron microscope (SEM) image of (a) a bare Li metal surface. SEM images of the PVdF protection layer dried under vacuum for (b) 12 h and (c) 24 h.

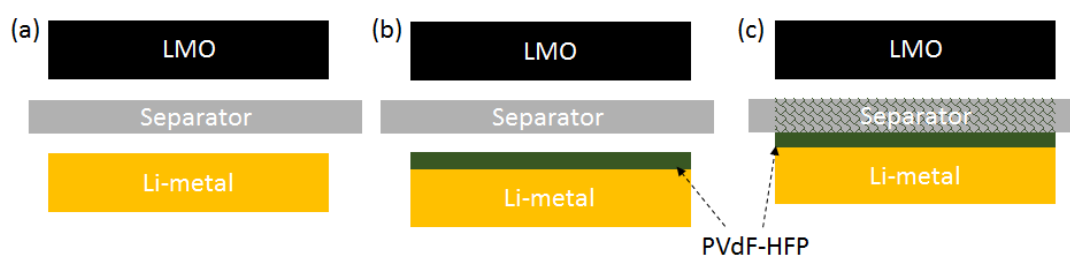

**Figure S2.** Schematics describing three different types of Li metal/LMO ( $\text{LiMn}_2\text{O}_4$ ) half cells based on (a) bare Li metal, (b) a protection layer, and (c) separator/Li metal integrated assembly.

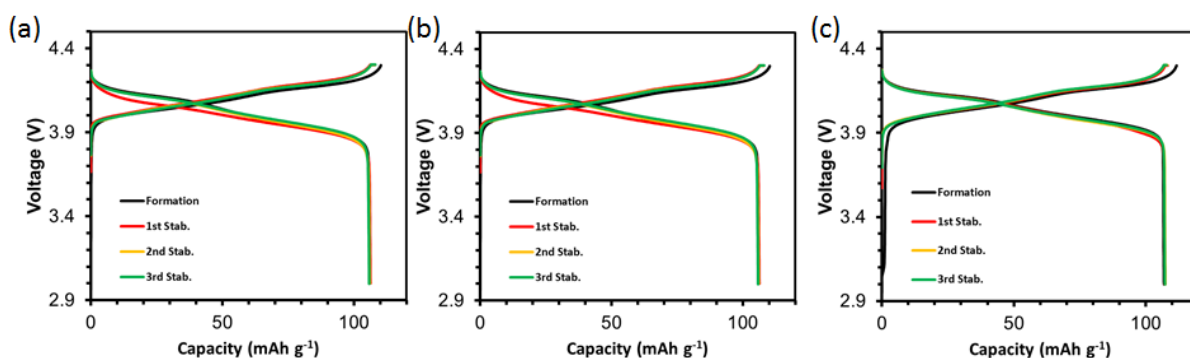

**Figure S3.** Potential profiles of Li metal/LMO ( $\text{LiMn}_2\text{O}_4$ ) half cells based on (a) bare Li metal, (b) a protection layer, and (c) separator/Li metal integrated assembly during precycling.

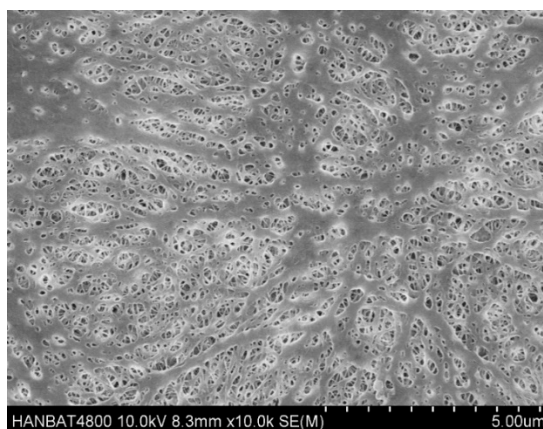

**Figure S4.** The PE separator of the separator/Li metal integrated assembly was gently removed by hand, and the surface structure of the PE side was monitored using SEM.

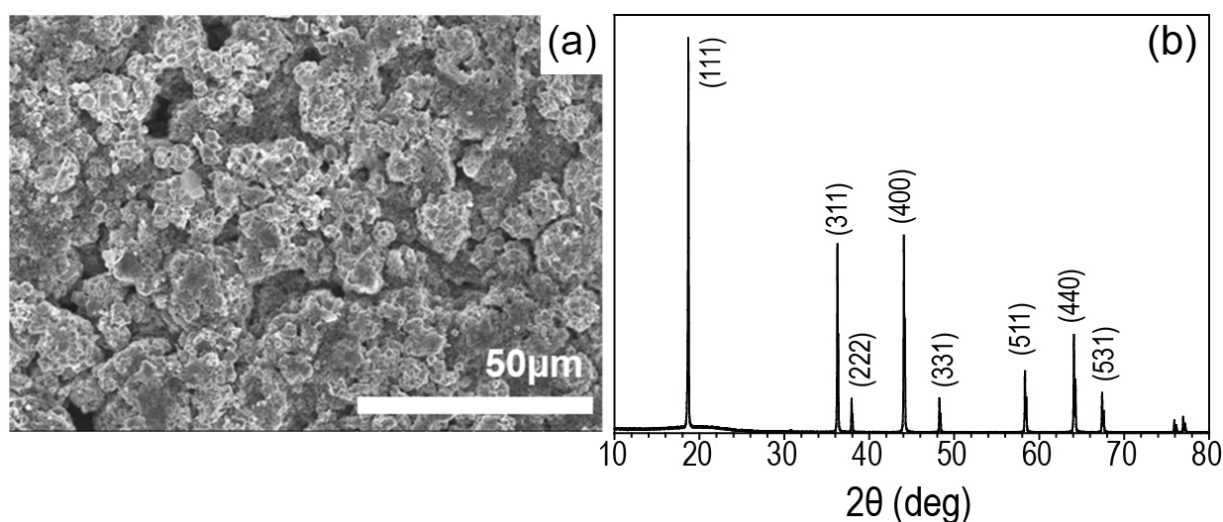

**Figure S5.** (a) a SEM image and (b) X-ray diffractograms of  $\text{LiMn}_2\text{O}_4$  electrode used in this study. XRD data were collected at  $2\theta = 10\text{--}80^\circ$ . The well-defined reflection peaks include eight lattice planes at (111), (311), (222), (400), (311), (511), (440) and (531).

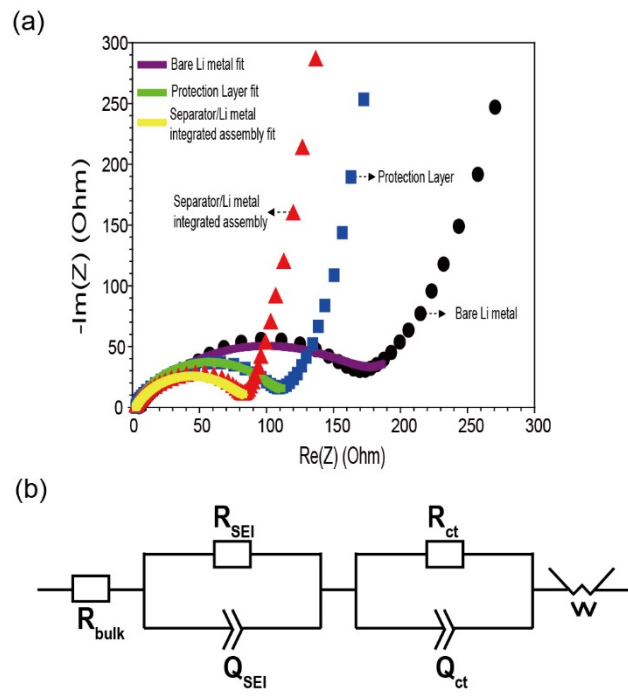

**Figure S6.** An equivalent circuit used in Figure 7 and data fitting results using the circuit.
